# Supplementary material
Source: PubMed Central journal article supplement (PMC5334457)
Supplement: NIHMS817726-supplement-Supp_file.pdf [file NIHMS817726-supplement-Supp_file.pdf]

## Supplemental Figure 1. *H. pylori* infection induces TNF- $\alpha$ and IL-8 expression

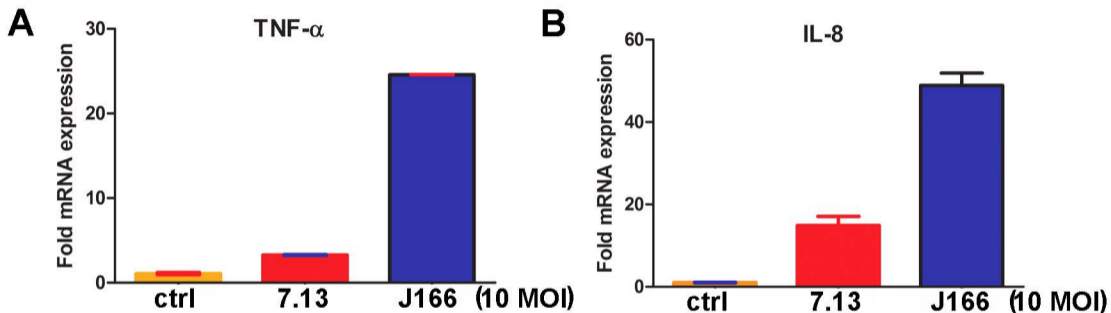

A-B) The qRT-PCR analysis of TNF- $\alpha$  and IL-8 was performed in AGS cells with *H. pylori* infection.

## Supplemental Figure 2. TNF- $\alpha$ activates NF- $\kappa$ B

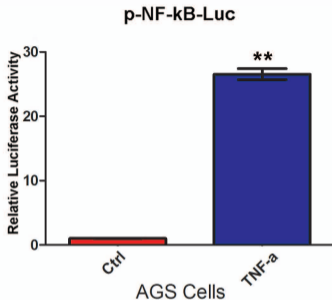

Luciferase reporter assay for p-NF- $\kappa$ B-luc in AGS cells with TNF- $\alpha$  treatment.

Supplemental figure 02, zhu et al.

### Supplemental Figure 3. *H. pylori* infection regulates DARPP-32 promoter activity

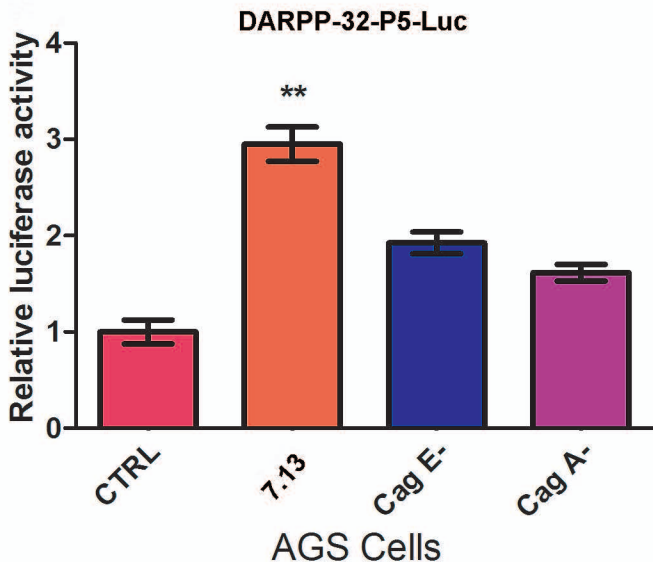

Luciferase reporter assay for DARPP-32-P5-luc in AGS cells co-cultured with *H. pylori* 7.13 strains (wildtype, *cagA*<sup>-</sup> and *cagE*<sup>-</sup> mutants).

Supplemental figure 03, zhu et al.

**Supplemental Figure 4. TNF- $\alpha$  enhances NF- $\kappa$ B binding to DARPP-32 promoter**

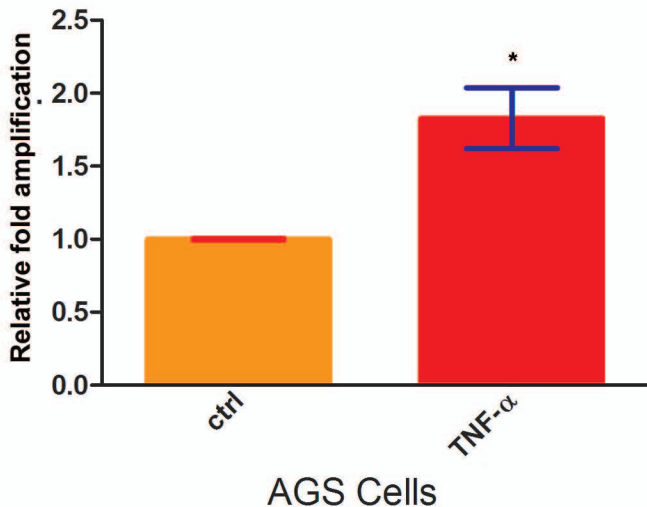

ChIP assay using a specific antibody against NF- $\kappa$ B-p65 for immunoprecipitation of formaldehyde-fixed chromatin in AGS cells with control or TNF- $\alpha$  treatment. qRT-PCR was performed using primers designed to amplify the NF- $\kappa$ B-p65 binding site on DARPP-32 promoter region.

**DARPP-32**

**p-NF- $\kappa$ B**

**NG**

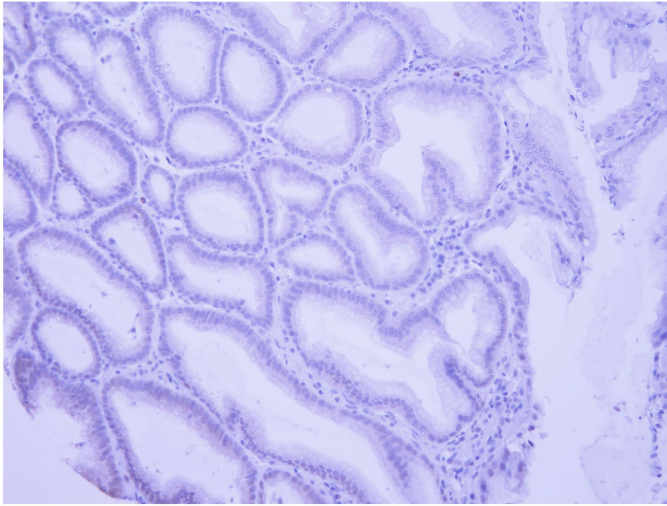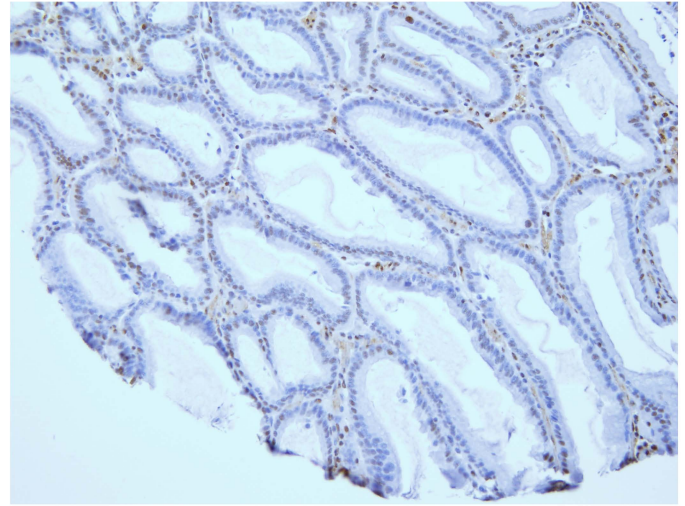

**IM**

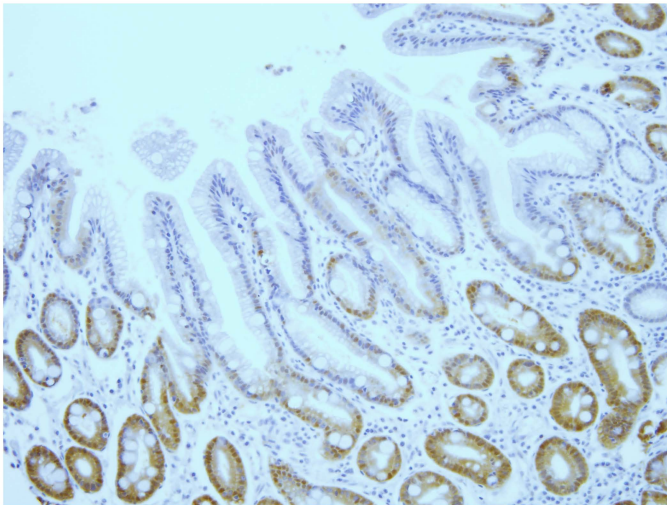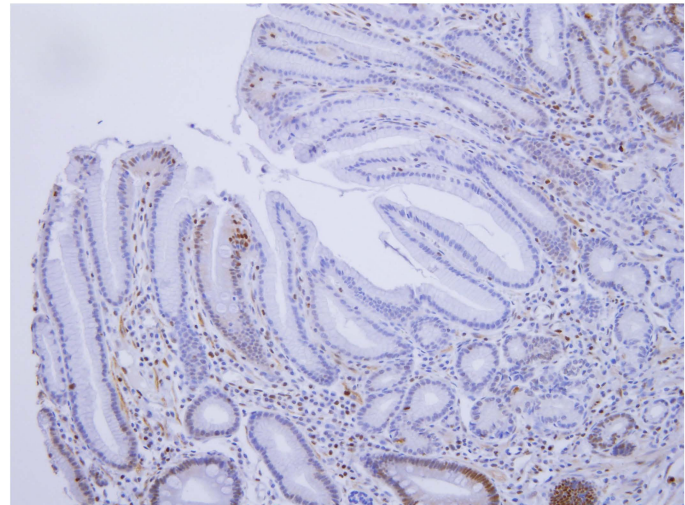

**HGD**

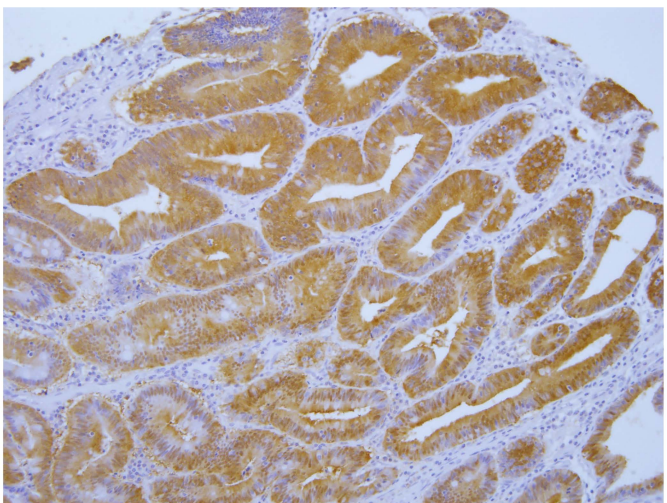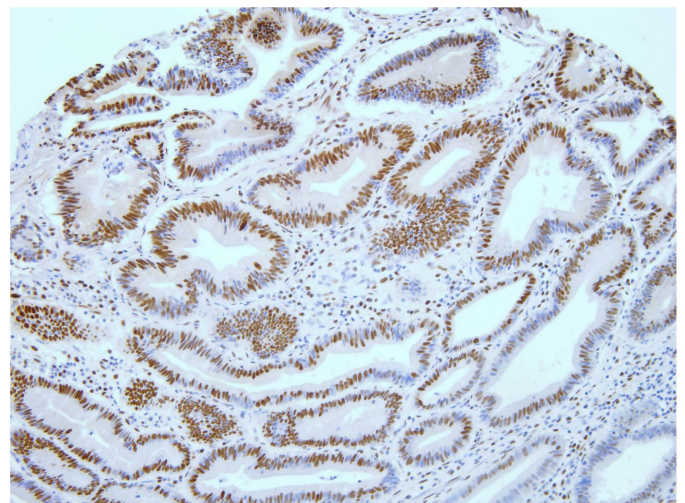

**A) Immunohistochemical staining of DARPP-32 and NF- $\kappa$ B in serial tissue samples from human gastric mucosa with normal histology (NG), intestinal metaplasia (IM), and high-grade-dysplasia (HGD).**

**DARPP-32**

**p-NF- $\kappa$ B**

**AdCa**

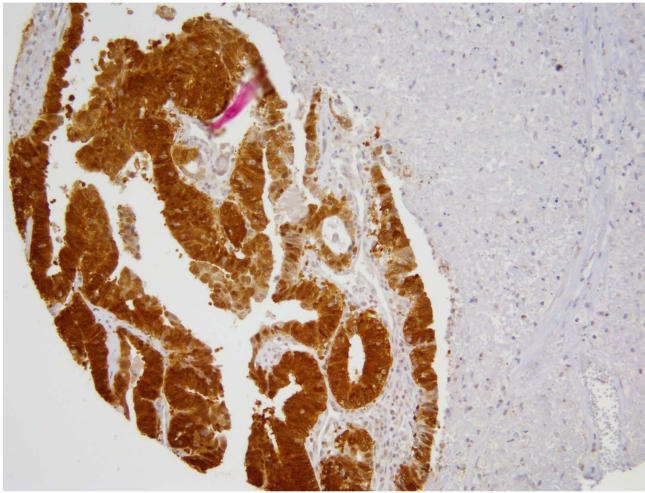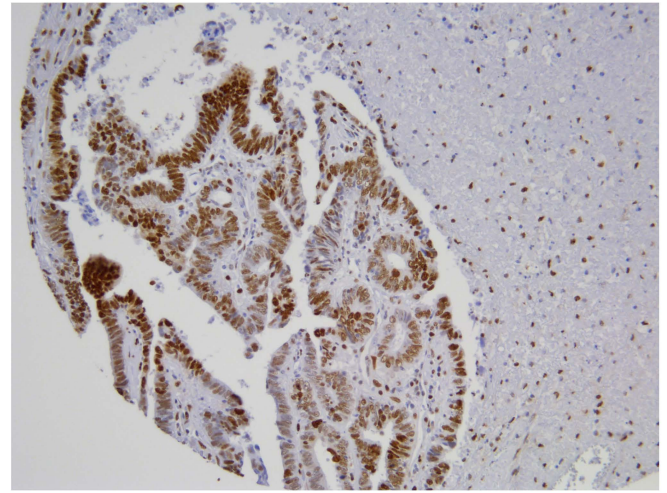

**AdCa**

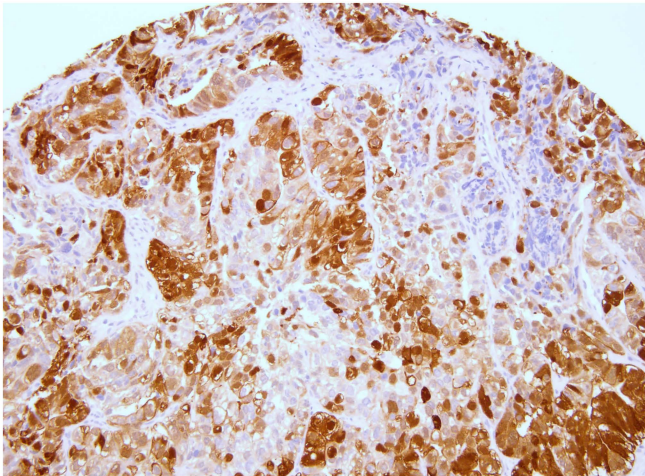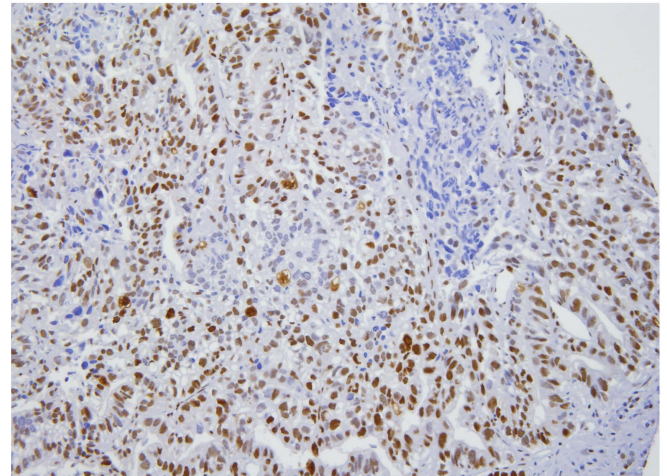

**B) Immunohistochemical staining of DARPP-32 and NF- $\kappa$ B in serial tissue sections from human gastric mucosa showing intestinal-type (upper panels) and diffuse-type (lower panels) adenocarcinomas.**

**Supplemental figure 05, zhu et al.**
